# Supplementary material
Source: PubMed Central journal article supplement (PMC3760152)
Supplement: NIHMS487414-supplement-Supplement.pdf [file NIHMS487414-supplement-Supplement.pdf]

Supplementary Figure 1

A.

miR-34a/ RNU expression after NTC or 34A mimic transfection

|            | 34A PCR | 34B PCR | 34C PCR | 34A std dev | 34 B std dev | 34C std dev |
|------------|---------|---------|---------|-------------|--------------|-------------|
| no reagent | 6.4     | 0.0     | 0.1     | 4.7         | 0.0          | 0.1         |
| NTC        | 0.0     | 0.0     | 0.0     | 0.0         | 0.0          | 0.0         |
| 34A mimic  | 80249   | 10.1    | 0.0     | 3362        | 0.0          | 0.0         |
| 34B mimic  | 0.1     | 25976   | 2.8     | 0.1         | 6028         | 0.4         |
| 34C mimic  | 0.0     |         | 31579   | 0.1         | 0.0          | 4584        |

B.

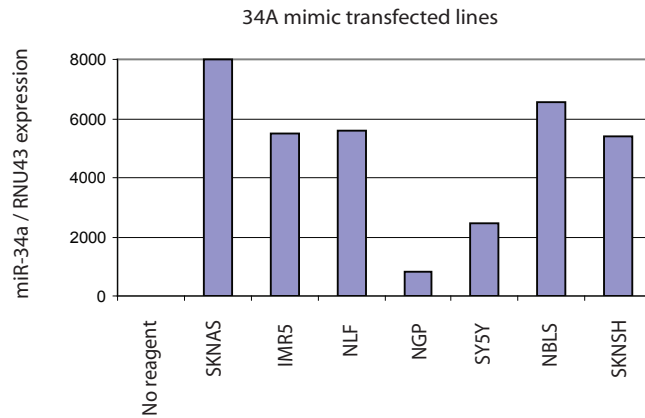

Figure S1: A. miR mimics could be measured by quantitative microRNA RT-PCR. SK-N-AS cells were transfected with miR-34a, b, or c mimics and then analyzed by microRNA RT-PCR (as described in material and methods). “no reagent” indicates that no Dharmafect I was added. B. Over-expression of miR-34A is achieved in all of the neuroblastoma cell lines.

Supplementary figure 2

| NLF | G0/G1 (%) | S phase (%) | G2/Gm (%) | Sub G0 (%) | SKNAS | G0/G1 (%) | S phase (%) | G2/Gm (%) | Sub G0 (%) |
|-----|-----------|-------------|-----------|------------|-------|-----------|-------------|-----------|------------|
| 24N | 53.12     | 28.86       | 15.53     | 1.13       | 24N   | 59.85     | 22.59       | 15.79     | 0.66       |
| 24A | 76.09     | 10.81       | 11.91     | 0.8        | 24A   | 63.75     | 18.62       | 15.61     | 0.94       |
| 48N | 66.38     | 18.27       | 12.55     | 2.27       | 48N   | 59.35     | 22.9        | 16.14     | 0.62       |
| 48A | 81.45     | 9.77        | 5.03      | 3.05       | 48A   | 68.62     | 14.82       | 15.15     | 0.6        |
| 72N | 63.71     | 21.44       | 13.11     | 0.68       | 72N   | 61.6      | 21.33       | 15.72     | 0.48       |
| 72A | 85.99     | 6.67        | 4.94      | 1.61       | 72A   | 70.89     | 12.4        | 14.58     | 1.03       |
| 96N | 63.33     | 19.3        | 16.06     | 0.66       | 96N   | 65.66     | 18.23       | 14.21     | 0.98       |
| 96A | 86.91     | 5.93        | 4.93      | 1.44       | 96A   | 72.23     | 10.71       | 12.95     | 2.29       |

Figure S2. Representative time course analysis of the cell cycle for NLF and SKNAS cell lines transfected with the non targeting control miRNA (NTC) or miR-34a mimic. Values are % of cells gated.

Supplementary figure 3

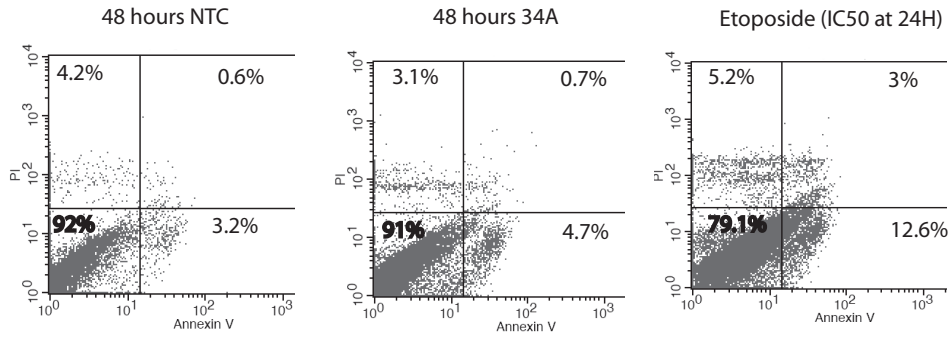

Figure S3: FACS scatter plots of FITC Annexin V of IMR5 cells treated with and without miR-34A mimic and an etoposide positive control . The x - axis is Annexin V staining and the y - axis is PI staining. Values are % of cells gated in a quadrant.

Supplementary figure 4

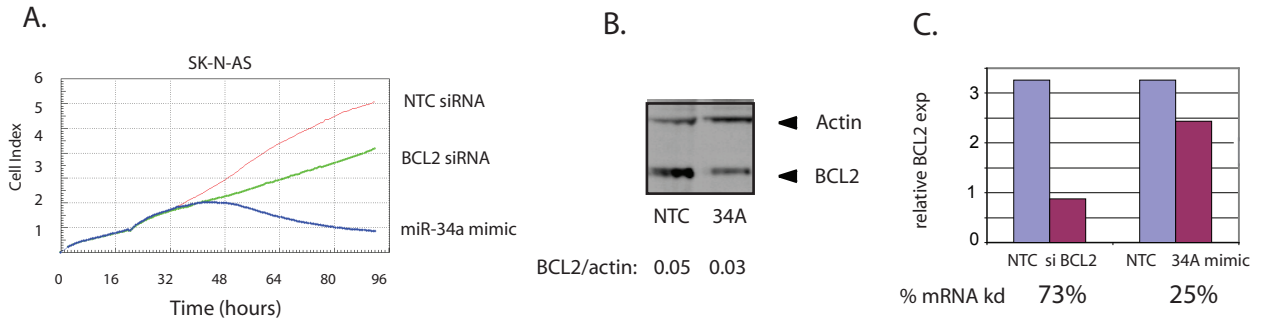

Figure S4: A. BCL2 siRNA knockdown has a modest growth inhibitory effect on SK-N-AS growth. NTC = non targeting control siRNA. B. Western blot 48 hours after miR-34a mimic transfection results in decreased BCL2 protein. NTC = non targeting control microRNA mimic 34A = miR-34a mimic. BCL2/Actin is the ratio of the integrated intensity (pixel volume) of the BCL2 band to the actin band. C. BCL2 siRNA and miR-34a mimic decrease BCL2 mRNA. Relative BCL2 expression is the expression of BCL2 normalized to the geometric mean of three housekeeping genes.
